# Supplementary material
Source: publisher figshare collection journal article supplement (https://acs.figshare.com/ndownloader/files/5088166)

# Microwave-Assisted Concise Total Syntheses of Quinazolinobenzodiazepine Alkaloids

Ji-Feng Liu, \* Mira Kaselj, Yuko Isome, Jenny Chapnick, Bailin Zhang, Grace Bi, Daniel  
Yohannes, Libing Yu, and Carmen M. Baldino

ArQule, Inc., 19 Presidential Way, Woburn, MA 01801, USA

[jliu@arqule.com](mailto:jliu@arqule.com)

## Table of Contents

|                                                 |         |
|-------------------------------------------------|---------|
| General and materials.....                      | S2      |
| <sup>1</sup> H and <sup>13</sup> C NMR spectra: |         |
| <b>Compd 1</b> .....                            | S3-S4   |
| <b>Compd 2</b> .....                            | S5-S6   |
| <b>Compd 3</b> .....                            | S7-S8   |
| <b>Compd 15</b> .....                           | S9-S10  |
| <b>Compd 4</b> .....                            | S11-S12 |
| <b>O-methylation Prod.</b> .....                | S13-S14 |
| <b>Compd 16</b> .....                           | S15-S16 |
| <b>Compd 17</b> .....                           | S17-S18 |

## SUPPORTING INFORMATION

**General and materials.** All reagents and solvents were purchased and used without further purification. Biotage Smith Synthesizer<sup>TM</sup> was used for microwave reactions. Irradiation was initiated at 300 W to raise the temperature to the set point and then power was applied at intervals and levels to maintain the desired temperature. Reactions were run in sealed vessels. Reaction times reported included time for the vial to ramp to the desired temperature. The product isolation was performed on prep-TLC plates or on preparative HPLC. The Preparative HPLC was carried out employing a ProntoSIL 120-10-C18 column (50x20 mm). The flow rate was at 44 mL/min utilizing an acetonitrile/water mobile phase. <sup>1</sup>H NMR (400 MHz) and <sup>13</sup>C NMR (100 MHz) spectra were recorded in CDCl<sub>3</sub> solution (unless otherwise stated). Chemical shifts are given in parts per million (*ppm*) downfield from tetramethylsilane (TMS) as an internal reference, and coupling constants (*J*-values) are in hertz (Hz). Low-resolution mass spectra were recorded in the ES<sup>+</sup> mode. The high-resolution mass spectra (HRMS) were recorded in the FAB mode.

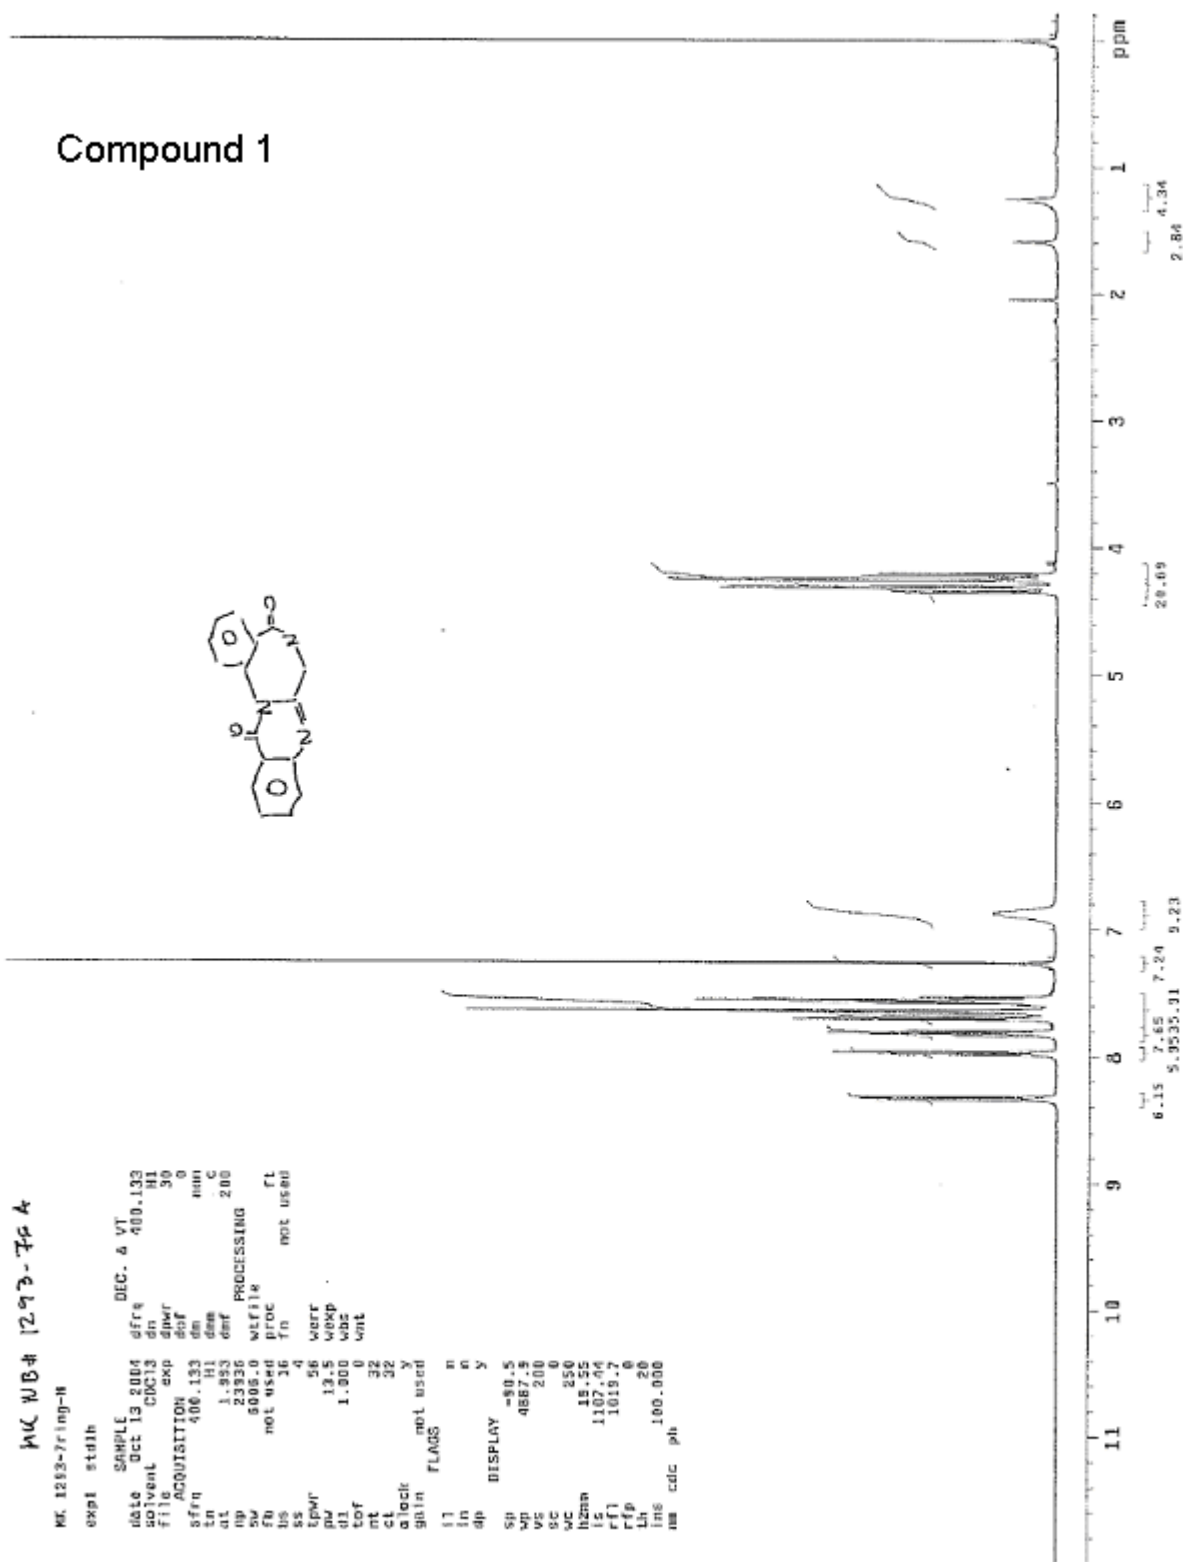

77-1  
28-13C  
MK WB-1292-76 A

exp1 61d13c

|         |             |            |          |
|---------|-------------|------------|----------|
| SAMPLE  |             | DEC. & VT  |          |
| date    | Mar 17 2004 | dfrq       | 400.133  |
| chem    | COC13       | dmf        | 1        |
| filn    | ACQUISITION | exp        | 37       |
| sfreq   | 100.623     | dmf        | 0        |
| at      | 1.159       | dmf        | 9700     |
| np      | 55908       | PROCESSING |          |
| sw      | 25000.0     | td         | not used |
| fb      | 13000       | wtfile     | not used |
| bs      | 16          | proc       | ft       |
| ss      | 4           | fn         | not used |
| tpwr    | 58          | weff       |          |
| pw      | 11.7        | wexp       |          |
| d1      | 0           | wdw        |          |
| tdf     | 10407       | wdw        |          |
| ct      | 45350       | wdw        |          |
| clock   | not used    |            |          |
| gain    | not used    |            |          |
| fl      | 0           | flags      |          |
| in      | 0           |            |          |
| dp      | 0           |            |          |
| DISPLAY |             |            |          |
| sp      | -201.0      |            |          |
| wp      | 22067.8     |            |          |
| vs      | 32          |            |          |
| sc      | 0           |            |          |
| wc      | 250         |            |          |
| ncmm    | 50.2        |            |          |
| rf1     | 10755.1     |            |          |
| rf2     | 7747.2      |            |          |
| ti      | 5           |            |          |
| na      | 100.000     |            |          |
| na      | no          |            |          |
| na      | ph          |            |          |

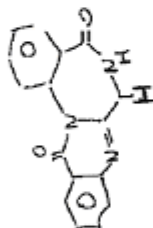

Compound 1

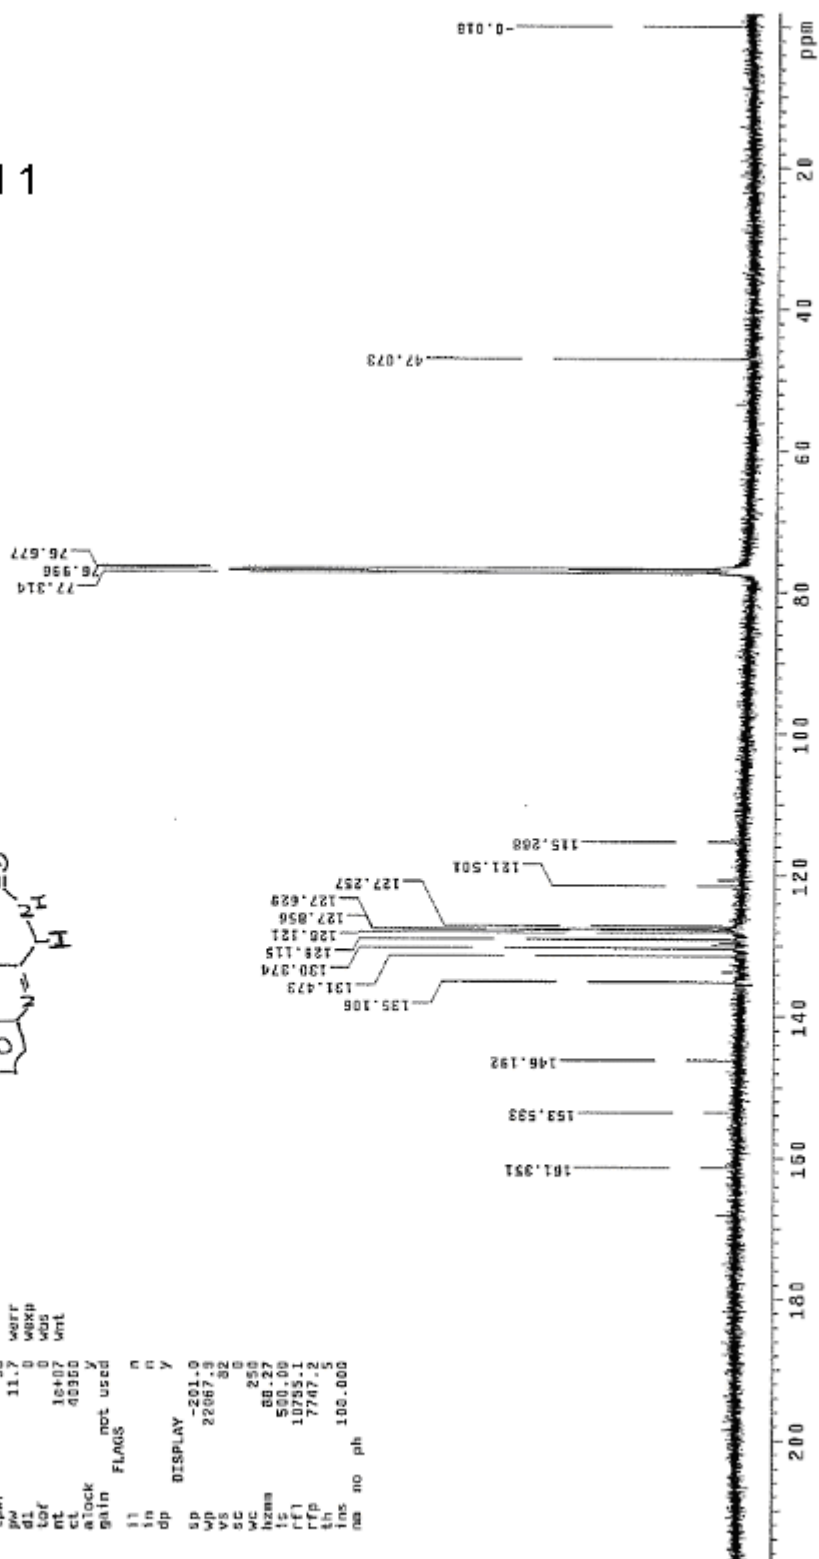

78-1 JFL 11/07/00 MK WD# 1296-76 B

exp1 sidh

SAMPLE DEC. & VT  
 date Mar 16 2004 dfrq 400.133  
 solvent CDCl3 in H1  
 file CDC13 exp 30  
 ACQUISITION exp 30  
 dfrq 400.133 dm 0 min  
 in H1 den 200  
 dt 1.993 dnt PROCESSING  
 ap 23956 wtfle  
 ac 2000.0 not used  
 bc 16 proc  
 ss 14 in not used  
 twr 56 werr  
 pw 13.5 wexp  
 dt 1.000 wbs  
 tof 0 wnt  
 nt 64  
 ct 64  
 alock not used  
 gain n  
 flags  
 ll n  
 in n  
 dp y  
 DISPLAY  
 sp 52.0  
 wp 452.0  
 wpc 21.0  
 xc 0  
 wc 250  
 hzmm 15.08  
 ls 2071.49  
 rfl 1015.1  
 rfp 0  
 th 10  
 ins 1.000  
 nm cdc ph

Compound 2

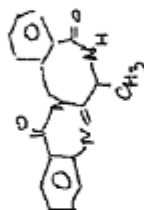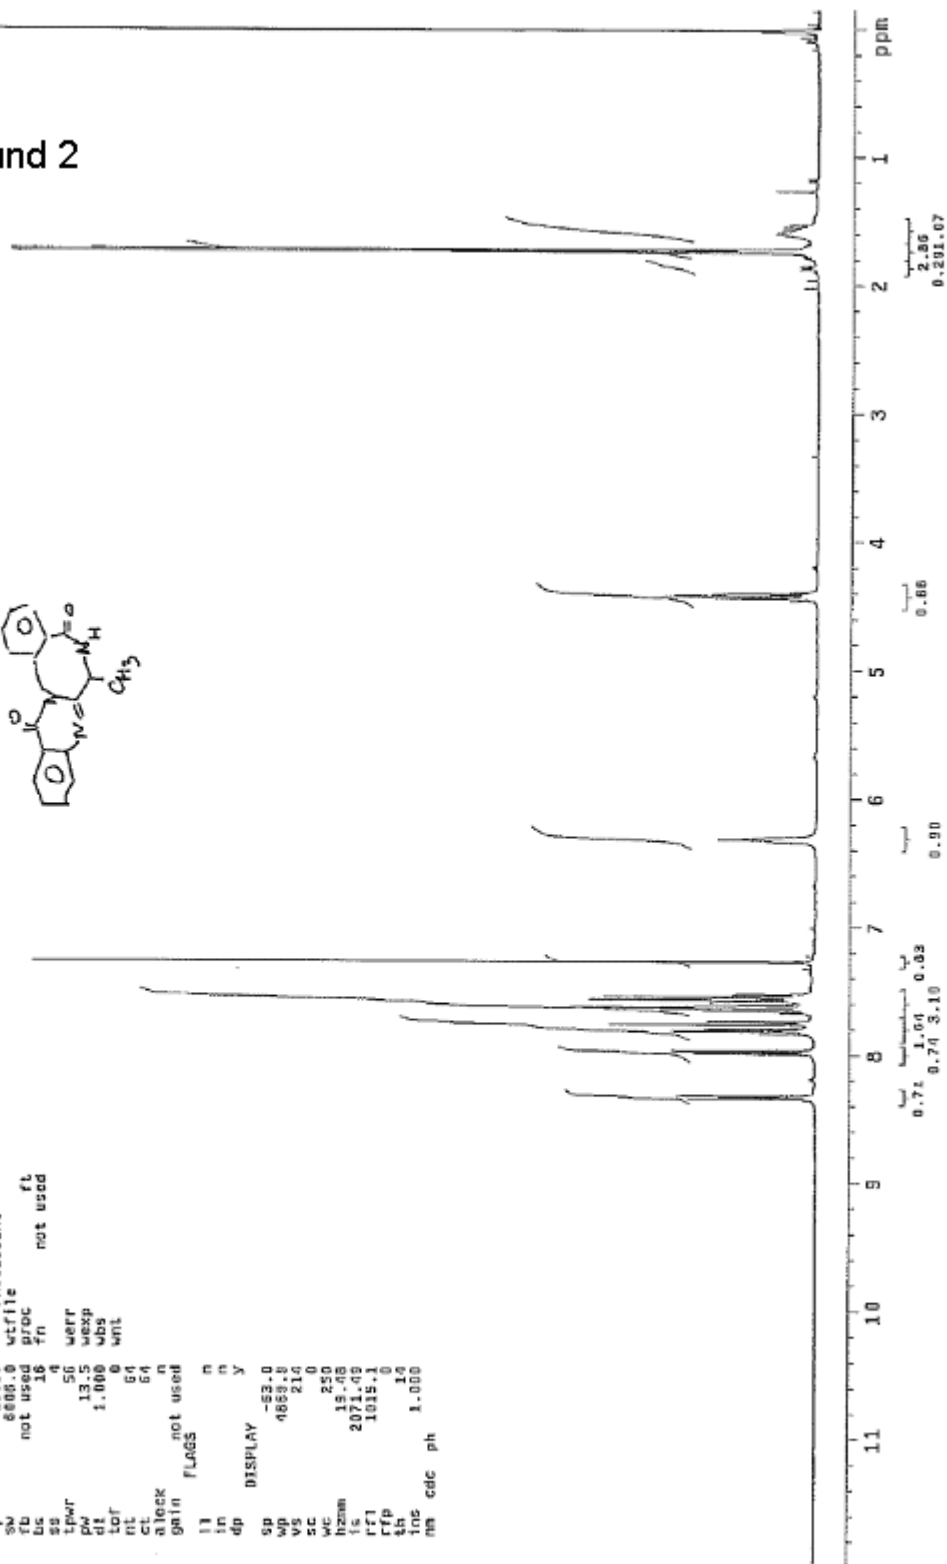

## Compound 2

13C OBSERVE F8-1 JFL hK N13-4 1296-76B

exp1 std13c

SAMPLE DEC. & VT  
 date Mar 16 2004 dfrq 400.133  
 solvent H<sub>2</sub>O d1 H1  
 file /export/home/~dowr 37  
 mirakas/mk-C13.f1~ ddr 0  
 d1 dm xvy w  
 ACQUISITION d dm xvy w  
 srfq 100.523 dfr 9700  
 in C13 dfr PROCESSING  
 at 1.189 lb 1.00  
 nu 50000 wfile  
 sw 25000.0 proc ft  
 lb 13000 fn not used  
 ls 18  
 ss 4 werr  
 tpar 58 wexp  
 pw 11.7 wba  
 d1 0 wnt  
 lof 0  
 nt 789399  
 ci 13072  
 clock y  
 gain not used  
 FLAGS  
 fl n  
 in n  
 dp y  
 DISPLAY  
 sp -450.0  
 wp 22255.3  
 vs 17.0  
 vc 0  
 hzmm 89.18  
 ls 500.00  
 rfl 10755.7  
 rfp 7747.2  
 th 24  
 lnd 100.000  
 nm no ph

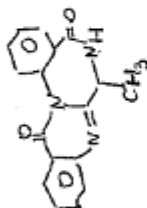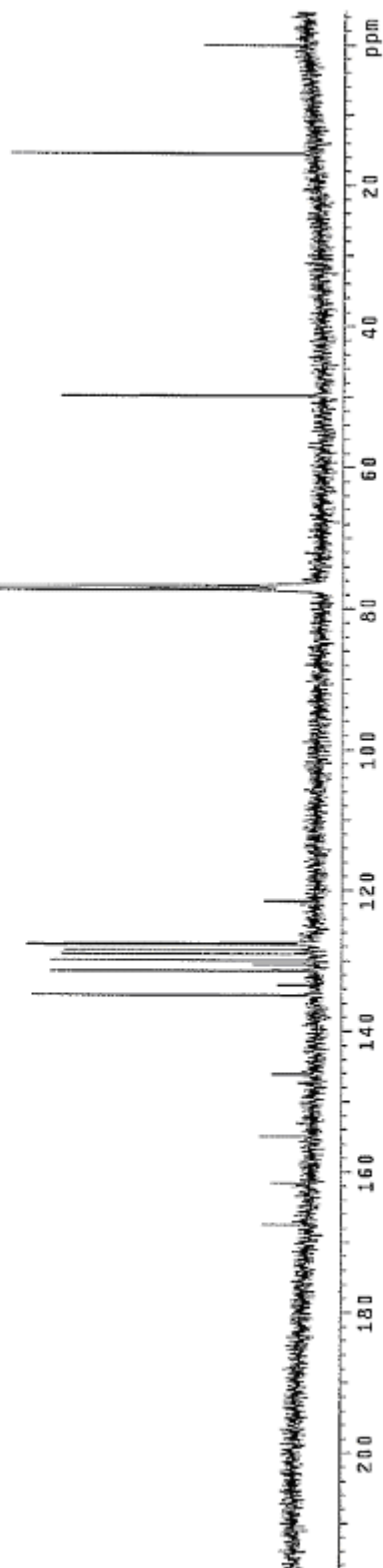

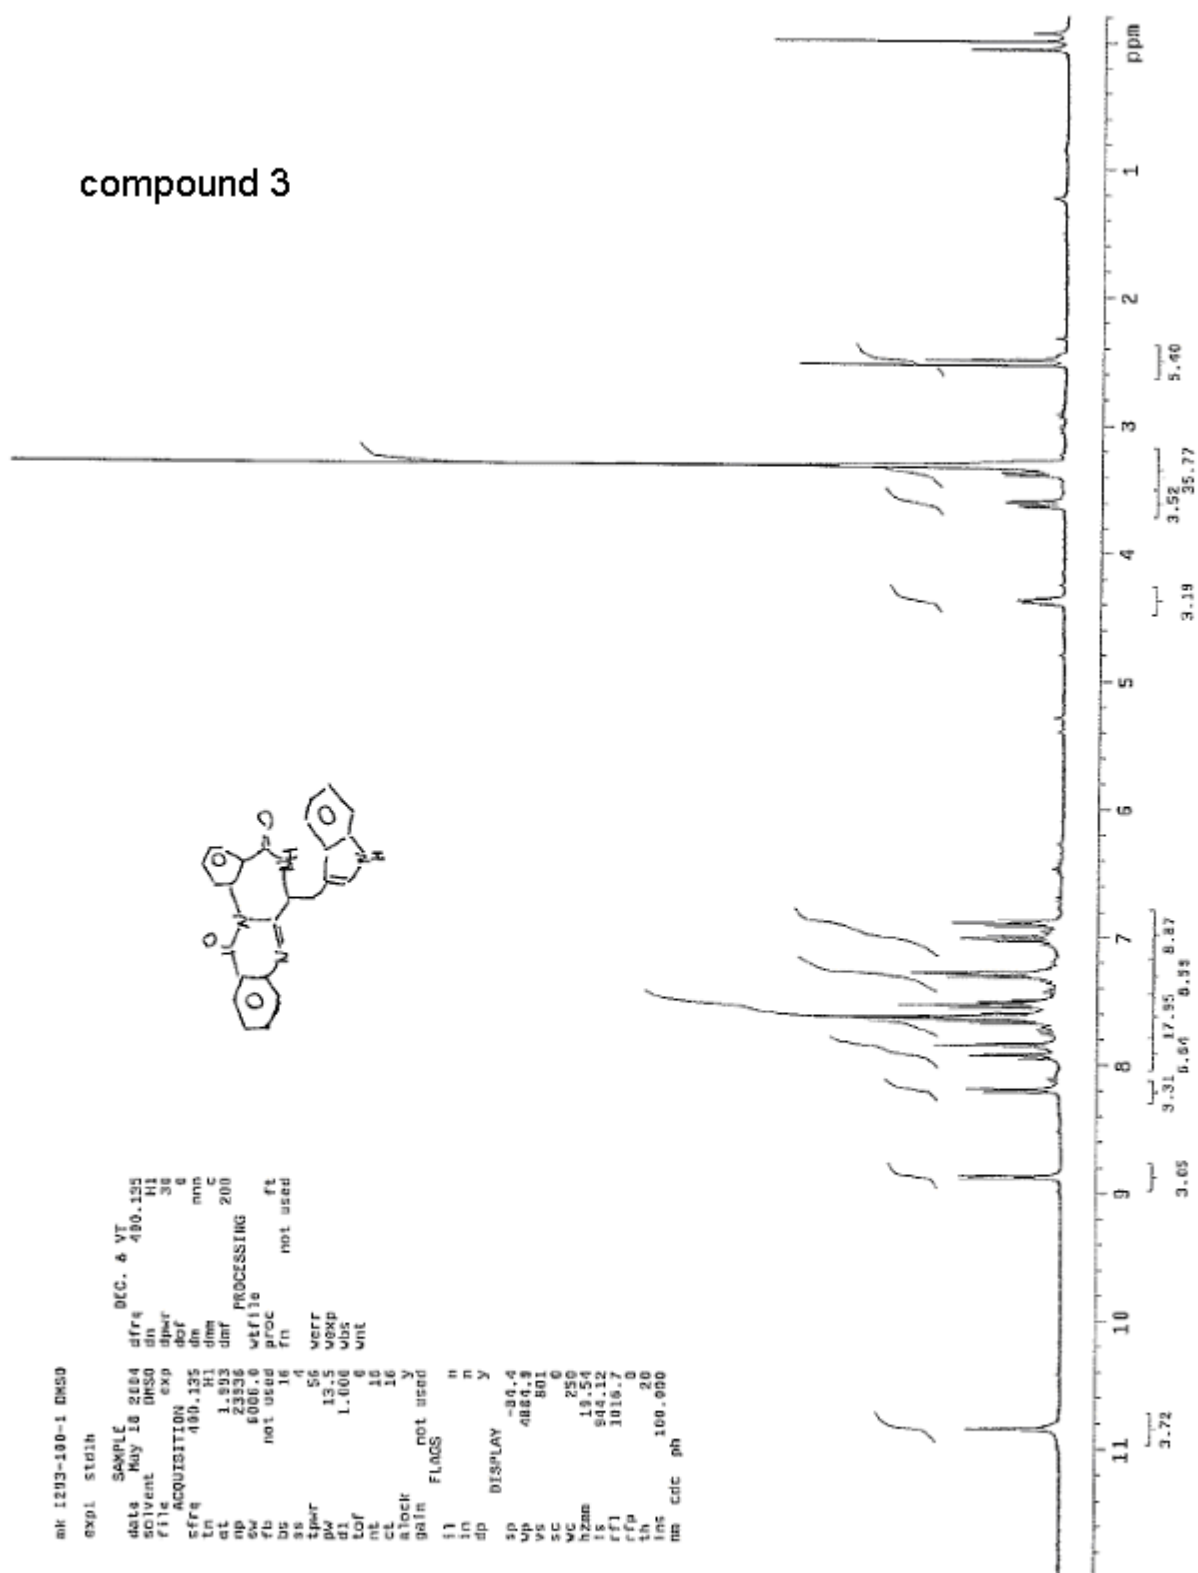

compound 3

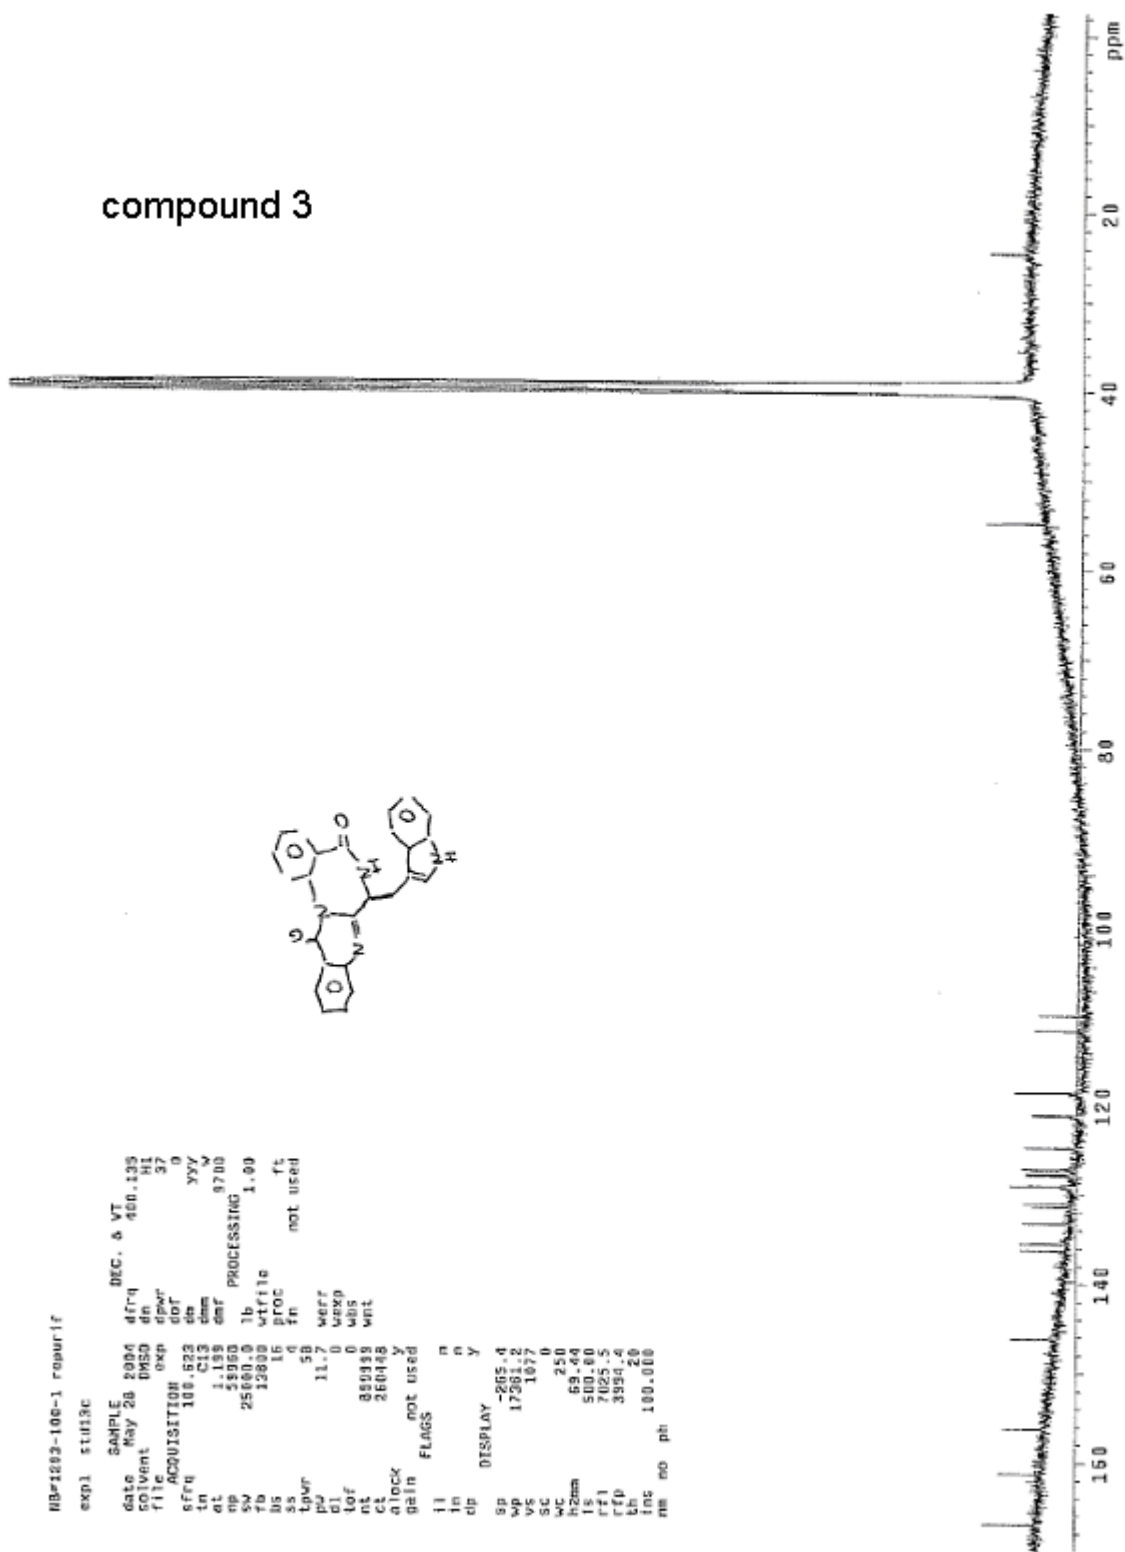



## SUPPORTING INFORMATION

NPL7R-Intern-p-1532-q2-2H1

exp1 std1h

SAMPLE DEC. A VT  
 date Jan 7 2005 dfrq 400.133  
 solvent CDCl3 dn H1  
 file /export/home/~dpvr  
 mkase11/NPL7R-Intern dot  
 re-p-1532-q2-2H1.fw dm men  
 id dan c  
 daf 200

ACQUISITION  
 sfrq 400.133  
 tn H1 wfile  
 at 1.993 proc ft  
 pw 2398 fn not used  
 ts 6000.0 werr  
 bs not used werr  
 ss 16 w2p  
 spwr 56 wnt  
 gm 13.5  
 dl 1.000  
 tof 0  
 nt 16  
 ct 0  
 elock y  
 gain not used

FLAGS  
 ll n  
 in n  
 dp y

DISPLAY  
 sp -57.2  
 wp 4402.5  
 vs 138  
 sc 0  
 w2mm 250  
 ls 17.33  
 ls 1431.16  
 rfl 1019.7  
 rfp 0  
 th 6  
 lns 1.000  
 nm cdc ph

compound 15

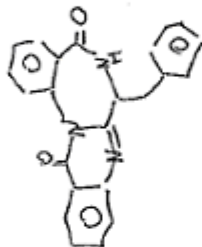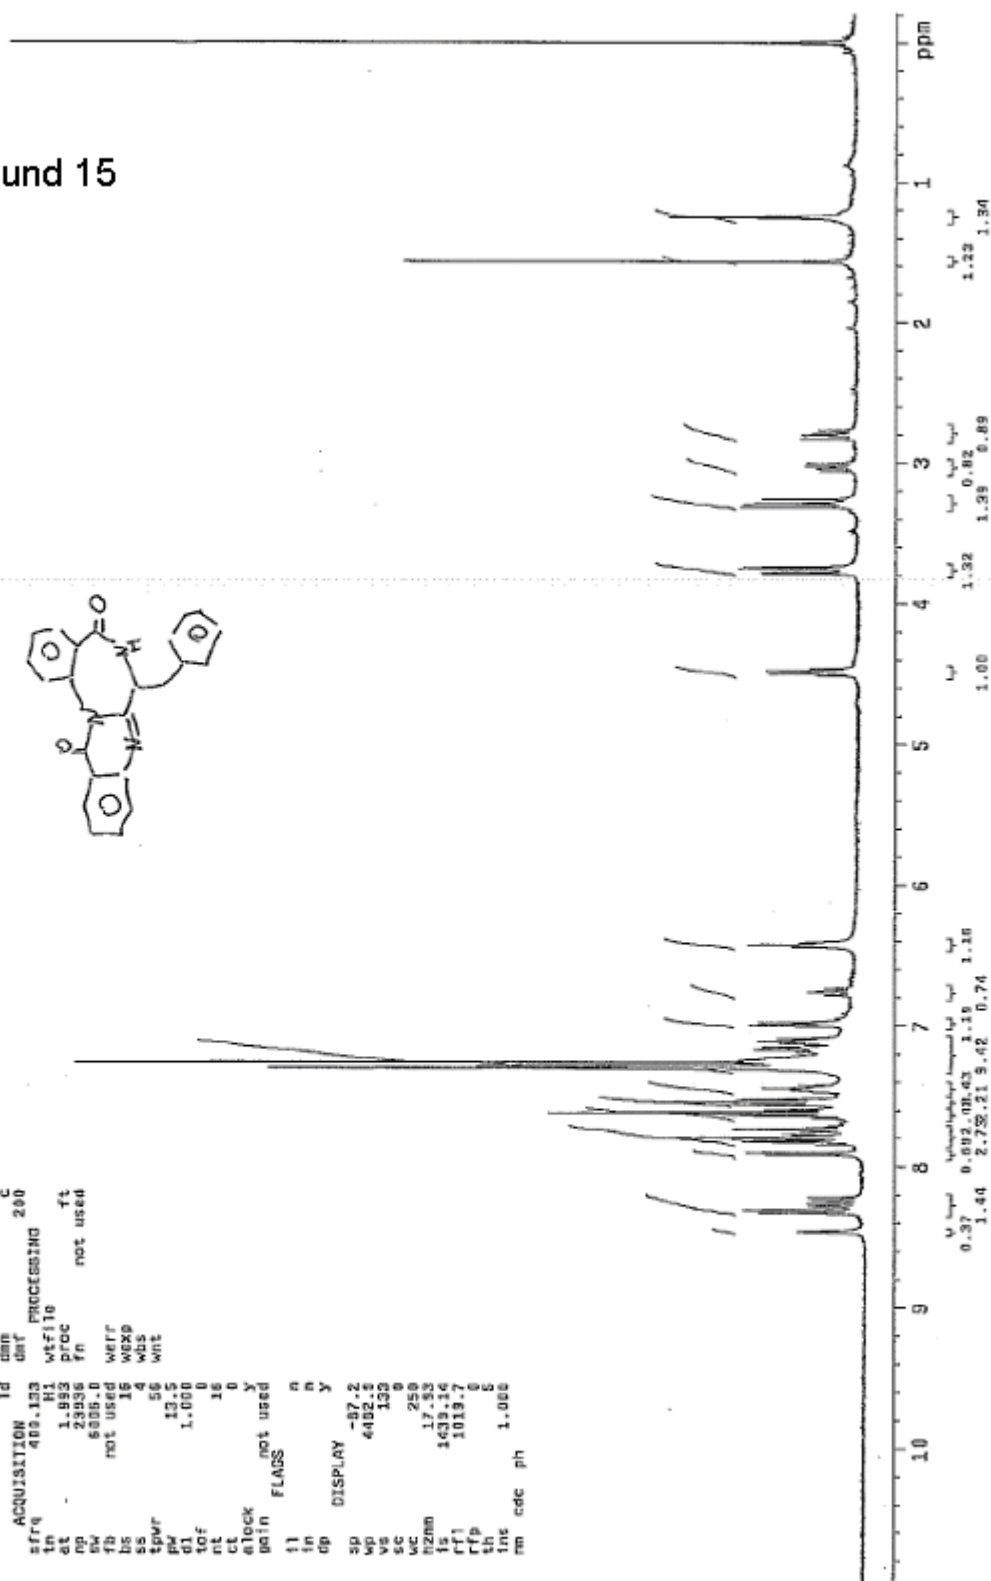

# SUPPORTING INFORMATION

compound 15

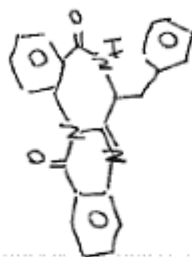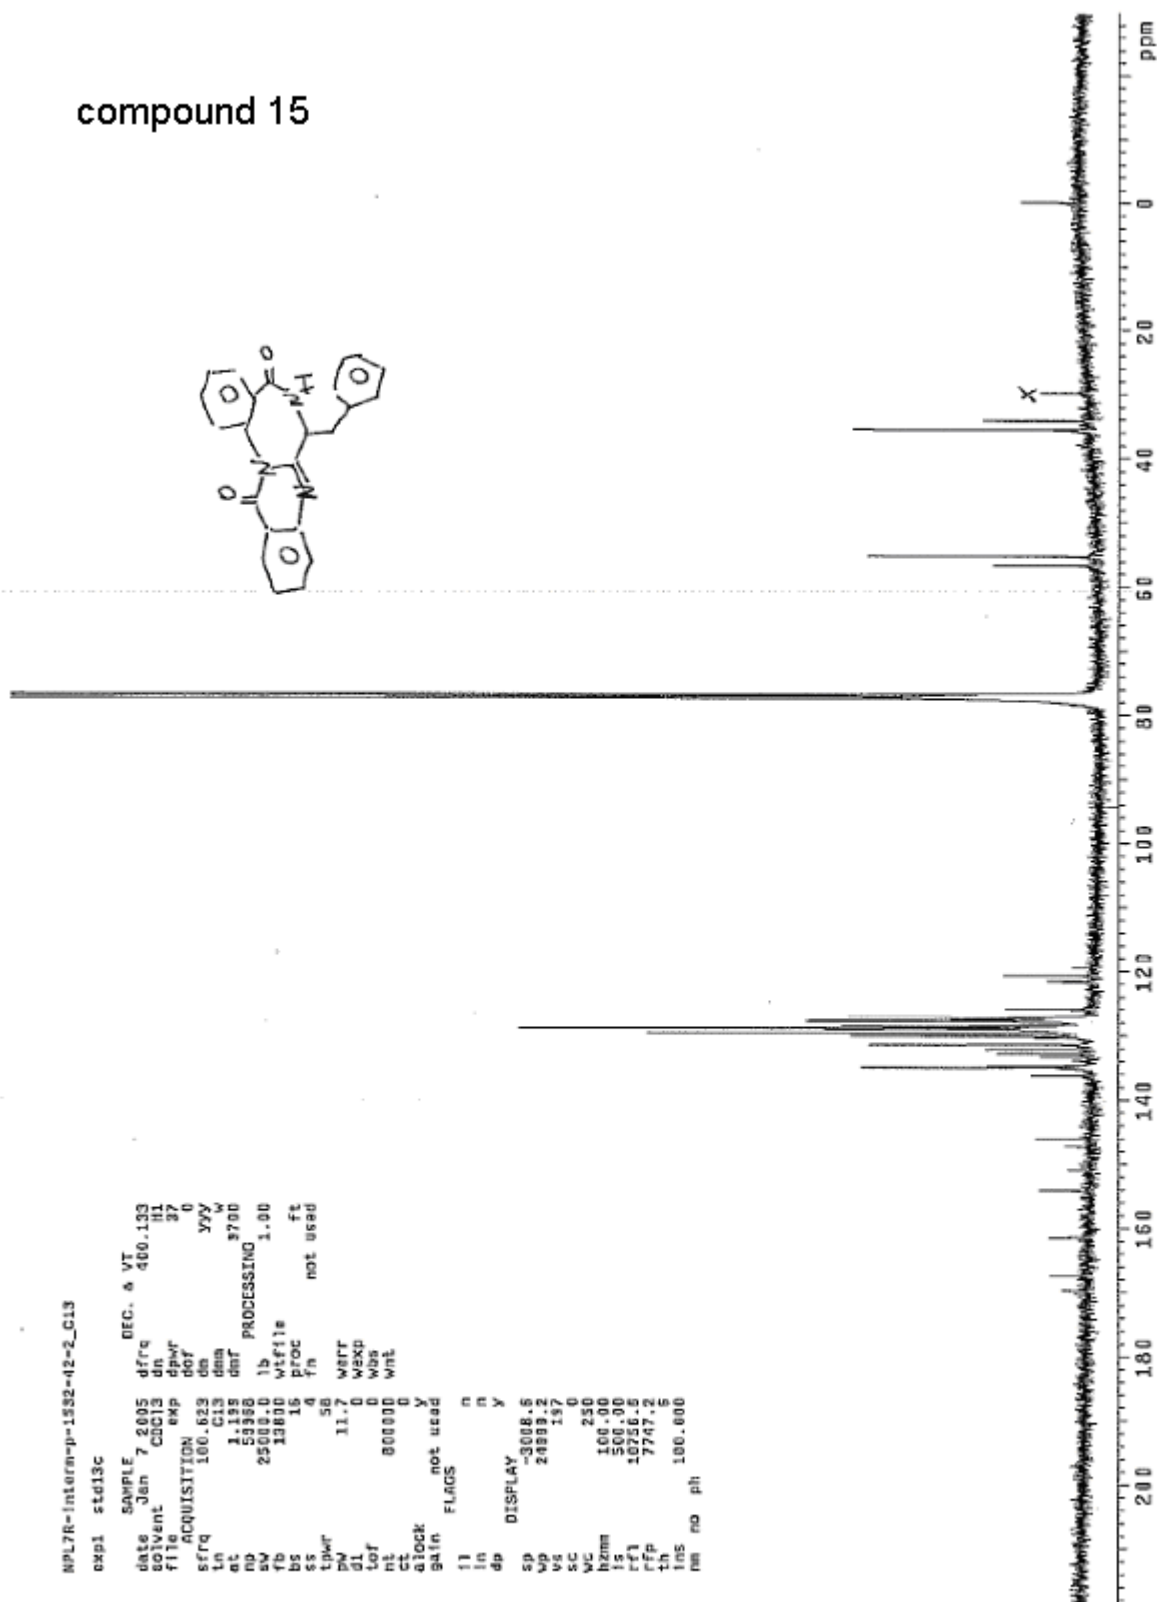

NPL7R-intern-p-1552-42-2\_C13  
 exp1 std13c  
 date Jan 7 2005 DEC. & VI  
 solvent CDCl<sub>3</sub> dn 400.133  
 file 37  
 ACQUISITION emp 37  
 sfrq 100.623 dm vvy  
 tn C13 dea w  
 at 1.185 dm 3700  
 nd 53360  
 sw 25000.0 lb PROCESSING 1.00  
 fb 13800 wfile  
 bs 16 proc ft  
 ss a fn not used  
 tpar 56  
 pw 11.7 werr  
 di 0 wexp  
 of 0 wse  
 ct 80000 wnt  
 clock 0  
 gain not used  
 flags  
 ll n  
 in n  
 dp y  
 DISPLAY  
 sp -3008.6  
 wv 24899.2  
 vs 157  
 sc 0  
 wc 250  
 hzmm 100.00  
 fs 500.00  
 rfa 10756.5  
 rfp 7747.2  
 tn 5  
 rms 100.000  
 nm no ph

compound 4

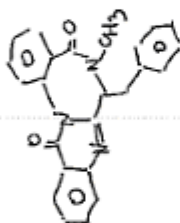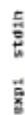

|                    |       |            |
|--------------------|-------|------------|
| SAMPLE             |       | DEC. & VT  |
| date can e sans    | dfr   | 460.193    |
| solute             | can   | 33         |
| solvent            | can   | 33         |
| file export/hot/~  | dwr   | 33         |
| jennan/mpt-78-NCH- | usf   | nrm        |
| Sp-1532-42-fid     | dm    | c          |
| ACQUISITION        | dm    | 200        |
| afrq               | dfr   | PROCESSING |
| 460.193            | H1    |            |
| 1.503              | wflla | fl         |
| 28396              | proc  | not used   |
| 6085.0             | fn    |            |
| not used           |       |            |
| 16                 | werr  |            |
| 56                 | wexp  |            |
| 136                | wes   |            |
| 1.000              | wnt   |            |
| 15                 | e     |            |
| 15                 | et    |            |
| 0                  | e     |            |
| n                  | n     |            |
| not used           | n     |            |
| FLAGS              |       |            |
| n                  | n     |            |
| n                  | n     |            |
| y                  | y     |            |
| DISPLAY            |       |            |
| -82.4              |       |            |
| 4077.6             |       |            |
| 167                |       |            |
| 0                  |       |            |
| 230                |       |            |
| 153                |       |            |
| 1739.40            |       |            |
| 1019.7             |       |            |
| 0                  |       |            |
| f-p                |       |            |
| h                  |       |            |
| s                  |       |            |
| ins                |       |            |
| cdc                |       |            |
| ph                 |       |            |
| 1.000              |       |            |

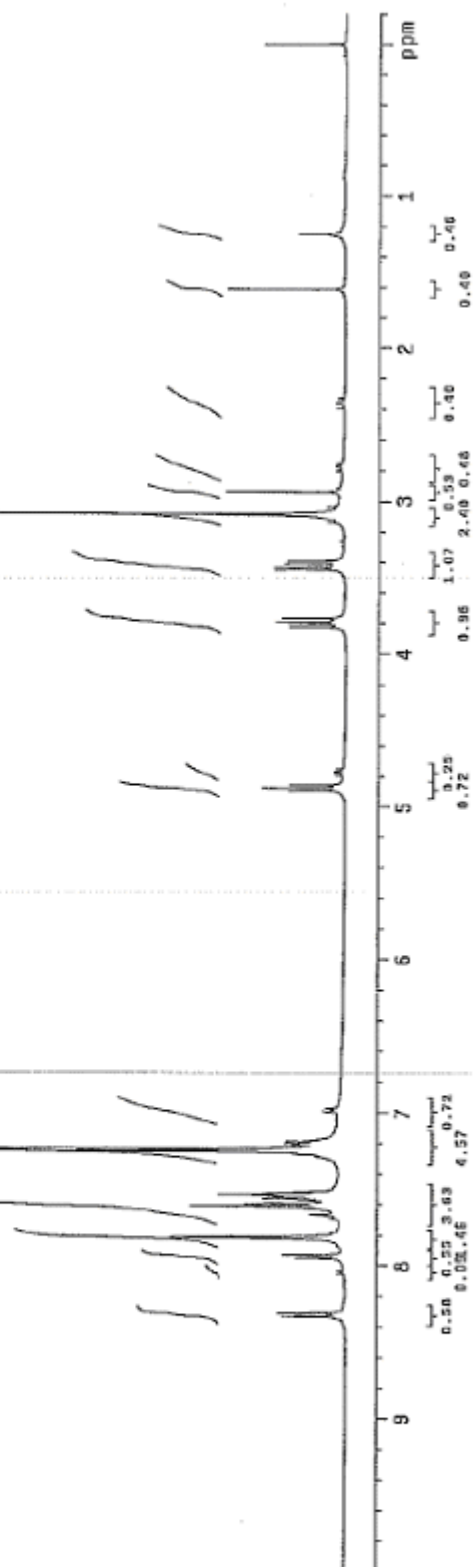

compound 4

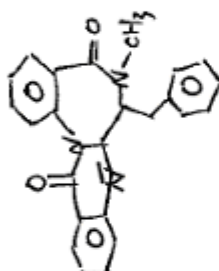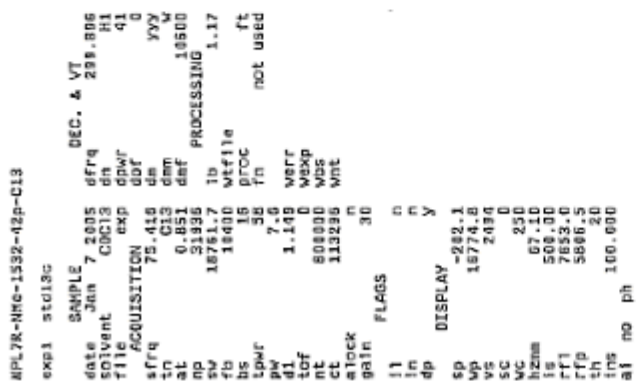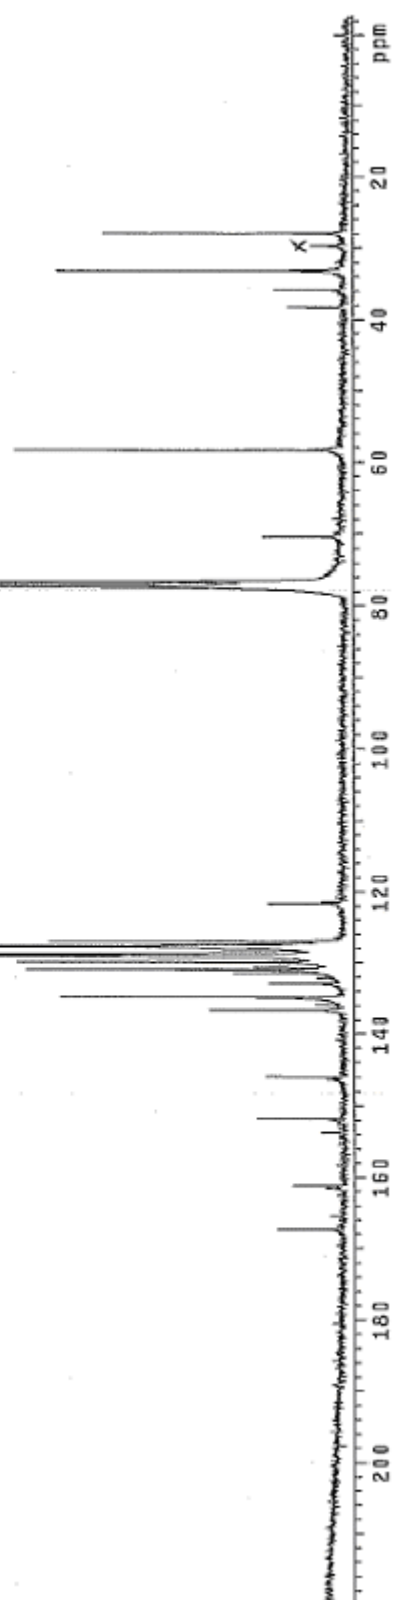

p.1 OMe.

NPL7R-NCN3p-2-1532-42

```

exp1 steln
SAMPLE
date Jan 8 2005 dfrq DEG. & VT 400.133
solvent CDCl3 dn
file /export/home/~dpr S0
jacking/NPL7R-NCN3p-2-1532-42.fid an 0
sp-2-1532-42.fid an min c
ACQUISITION
dfrq 400.133 chr PROCESSING 200
ft 1.000
at 1.801 wdf16
ap 21836 proc ft
sw 6000.0 fn not used
fb not used
ls 16 warr
ss 4 wexp
tpwr 56 wbs
pv 13.5 wnt
d1 1.000
tof 0
nt 16
ct 0
alock y
gain not used
FLAGS
ll n
in n
dp y
sp -85.3
wp 4651.3
vc 110
mc 250
hzmm 16.38
ls 1423.94
rfi 1013.7
rfp 0
th 20
fns 100.000
nm cdc ph

```

O-methylation prod

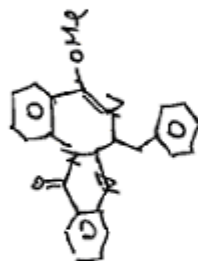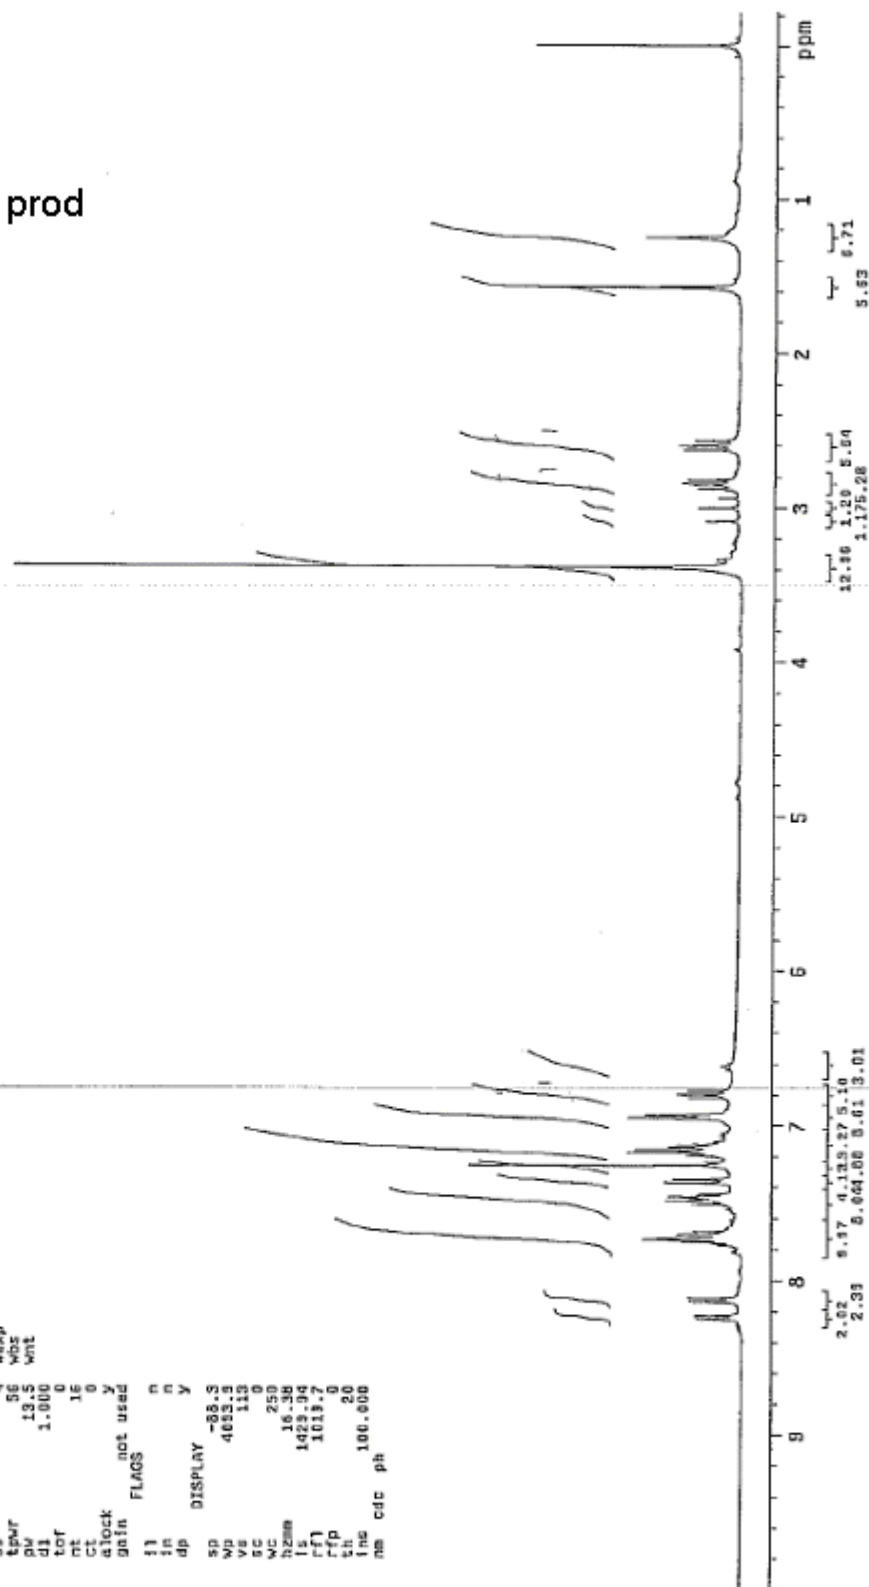

JNC-1532-42-1\_OMe-TLC-C13

ex01 std13C

SAMPLE DEC. & VT  
 date Jan 15 2005 dfrq 400.133  
 solvent CDCl3 dn H1  
 file CEC13 exp 37  
 ACQUISITION exp 37  
 sfcg 100.823 dm yyy  
 tn C13 dm yyy  
 dt 1.023 dmf 9700  
 sp 53868 1b PROCESSING 1.03  
 cp 250000 1b file  
 fb 13000 1b proc  
 bs 15 1b not used  
 ss 58  
 tpr 11.7 werr  
 pw 0 wexp  
 d1 0 wds  
 tcf 50000 wnt  
 nt 250000  
 ct 250000  
 atock y  
 gain not used  
 FLAGS  
 fl n  
 in n  
 dp y  
 DISPLAY  
 sr -200.1  
 wp 22129.1  
 vs 85  
 sc 250  
 bc 83.52  
 f2mm 539.32  
 fl 19750.0  
 rfl 7742.2  
 th 103.000  
 ins no ph

O-methylation prod

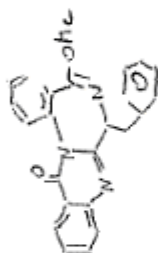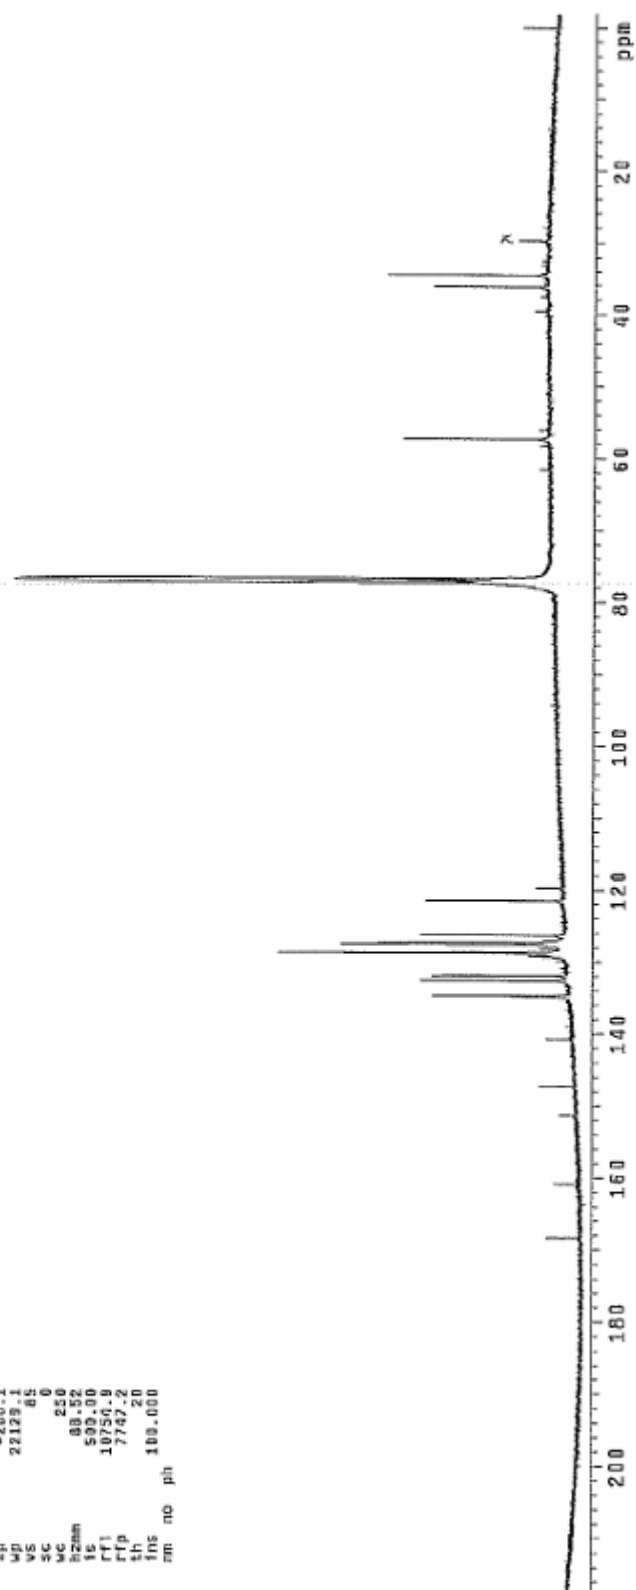

compound 16

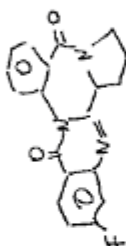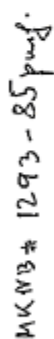[illegible]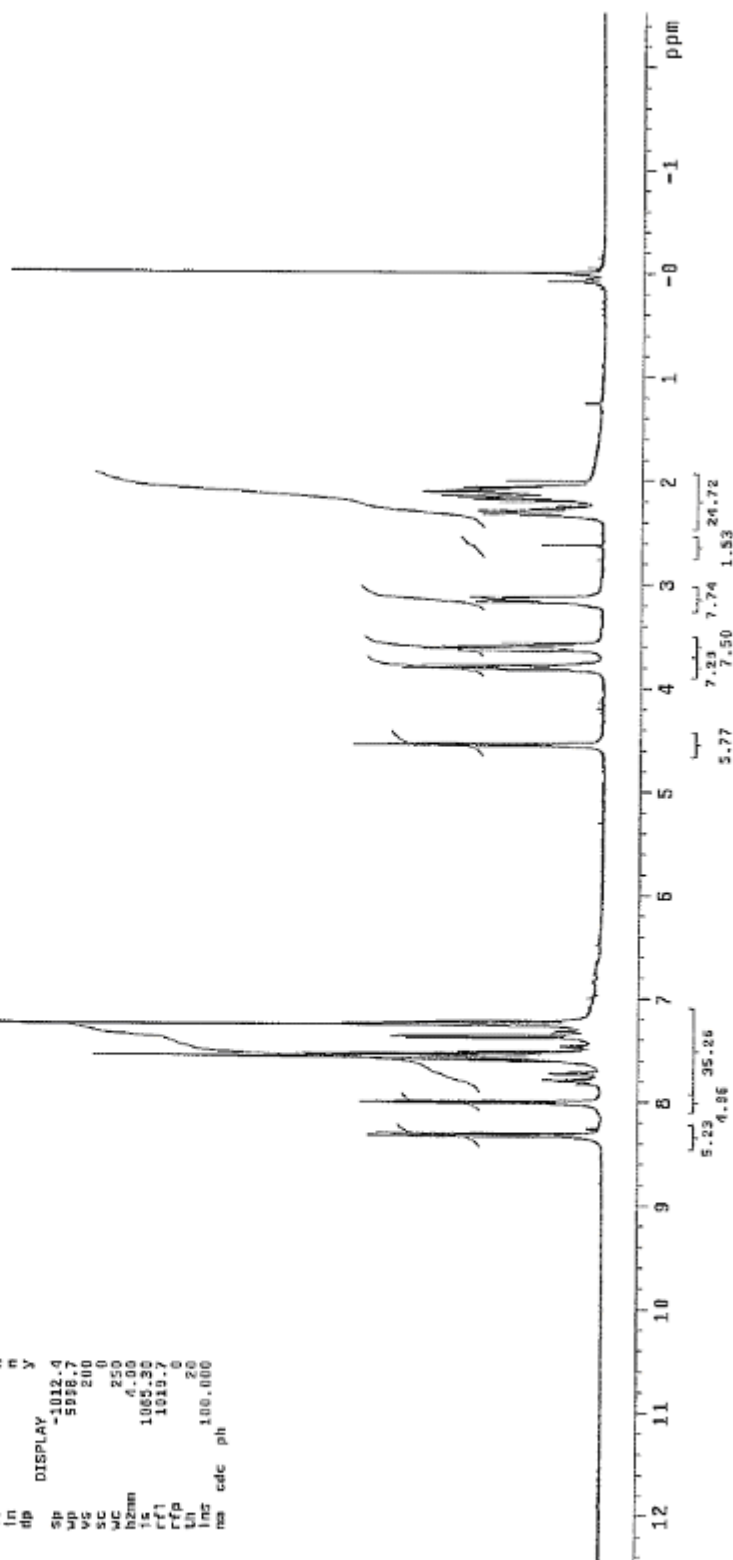

KV NB # 1293-85B

13C OBSERVE  
DOS 85B *ref.*  
expt 1293-85B

|             |                   |           |            |
|-------------|-------------------|-----------|------------|
| SAMPLE      |                   | DQC. & VT |            |
| date        | Apr 6 2004        | dfreq     | 400.139    |
| solvent     | CDCl <sub>3</sub> | dn        | H1         |
| flia        | exp               | dpcr      | 37         |
| ACQUISITION |                   | exp       | 0          |
| sfreq       | 100.623           | de        | VVY        |
| in          | C13               | dam       | W          |
| at          | 1.199             | def       | 8700       |
| np          | 58968             |           |            |
| sw          | 25000.0           | lb        | PROCESSING |
| fo          | 13800             | wtfile    | not used   |
| ps          | 16                | proc      |            |
| tsmr        | 58                | fn        | not used   |
| pw          | 11.7              | mcrr      |            |
| d1          | 0                 | mcsp      |            |
| tof         | 78959             | mba       |            |
| nt          | 44192             | mnt       |            |
| cl          | not used          |           |            |
| clock       | Y                 |           |            |
| gain        | not used          |           |            |
| FLAGS       |                   |           |            |
| l1          | n                 |           |            |
| l2          | n                 |           |            |
| l3          | n                 |           |            |
| dp          | Y                 |           |            |
| DISPLAY     |                   |           |            |
| cp          | -65.1             |           |            |
| wp          | 22660.1           |           |            |
| vs          | 112               |           |            |
| sc          | 0                 |           |            |
| vc          | 250               |           |            |
| hznm        | 53.84             |           |            |
| ls          | 500.00            |           |            |
| rfl         | 2505.6            |           |            |
| rfp         | 0                 |           |            |
| th          | 20                |           |            |
| ins         | 100.000           |           |            |
| na          | no                | ph        |            |

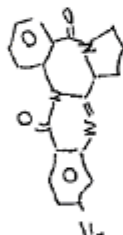

compound 16

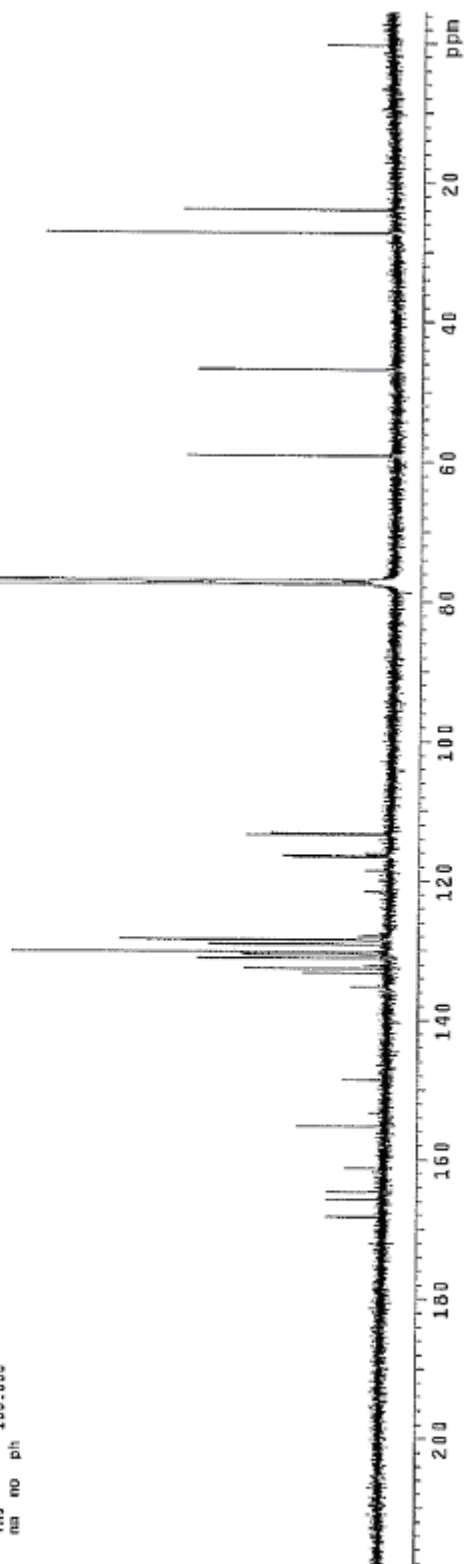



WV NB # 1293 - 86B

DOS 2 86B-2

exp1 std1h

SAMPLE DEC. & VT  
 date Apr 5 2004 cfrq 400.133  
 solvent CDCl3 in HI 30  
 file CDC13 exp 30  
 sfrq ACQUISITION 400.133  
 in HI 0mm  
 at 1.895 23825  
 pw 8006.0 wtrfile  
 fb not used proc ft  
 bs 16 fn not used  
 ss 4  
 tavr 50 werr  
 pw 13.5 wexp  
 d1 1.000 wts  
 tot 0 wnt  
 nt 16  
 ct 16  
 atlock not used  
 gain y  
 flags  
 il n  
 in n  
 op y  
 DISPLAY  
 sp -115.1  
 wp 4012.5  
 vc 136  
 sc 0  
 wc 250  
 hznm 19.65  
 fs 2263.16  
 rf1 1013.7  
 rfp 0  
 th 20  
 ins 2.000  
 ma cdc pb

compound 17

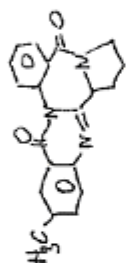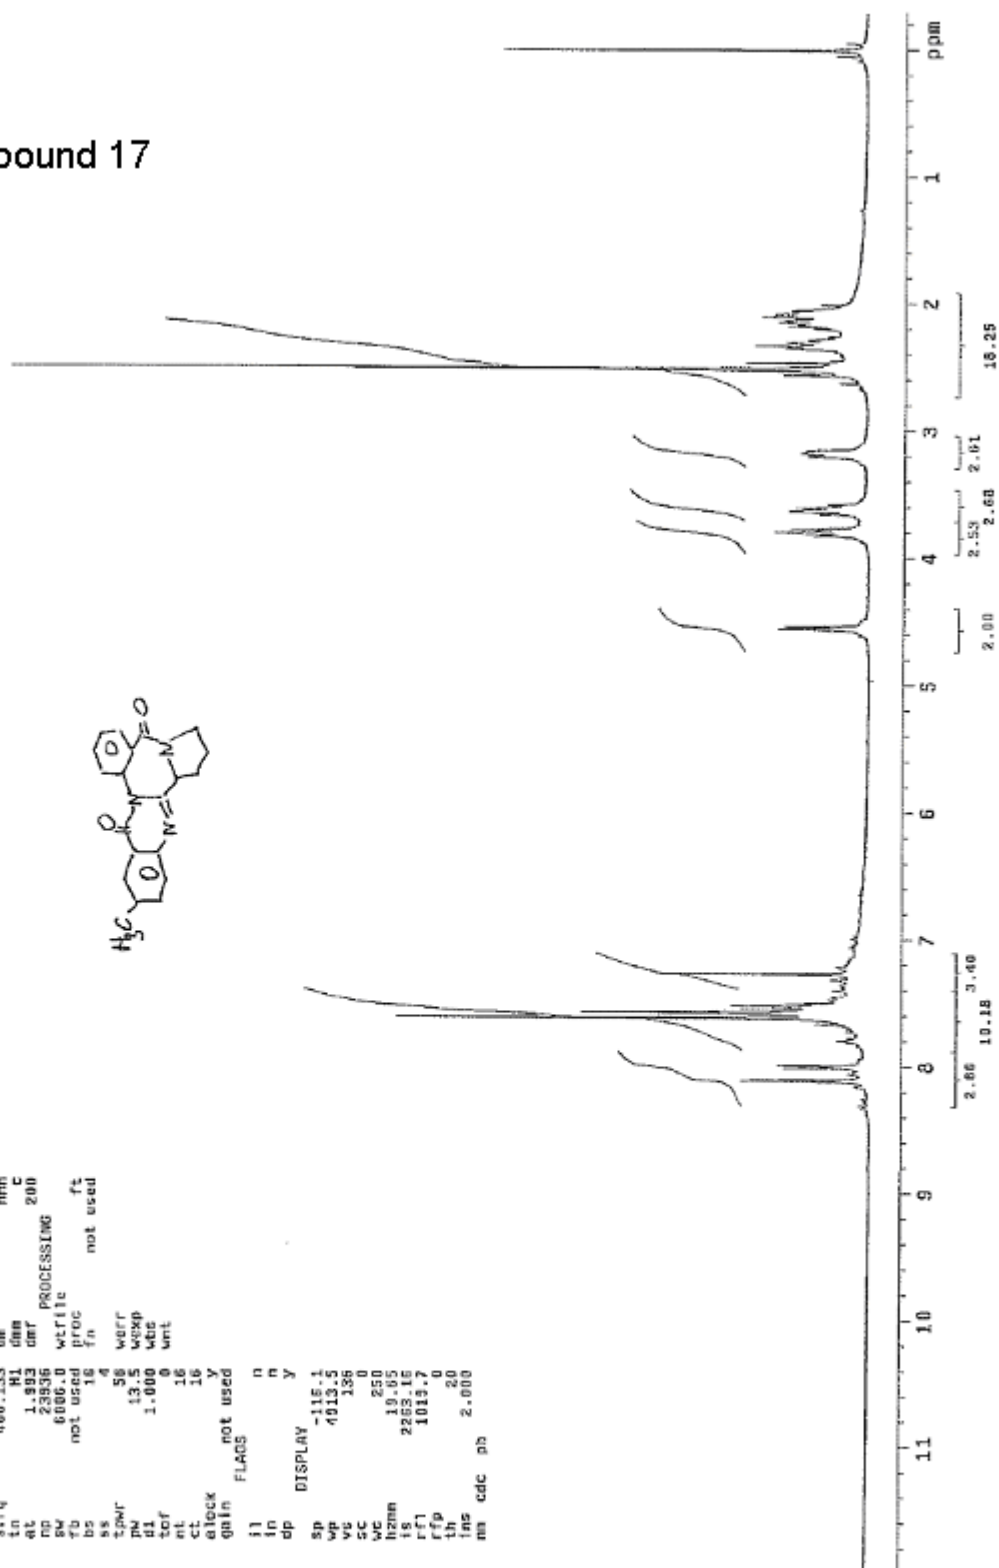

KX NB# 1293 -86 B

13C OBSERVE

D52-82B2

exp1 std13c

SAMPLE  
 date 5 2004  
 solvent CDCl3  
 file ACQUISITION exp  
 sfile 100.583  
 in 1  
 nt 1  
 nt 50000  
 sw 25000.0  
 fb 13000  
 bs 16  
 ss 4  
 tpwr 58  
 pw 11.7  
 di 0  
 tof 1e+07  
 ct 42304  
 alock y  
 gain not used  
 flags n  
 il n  
 in n  
 dp y  
 sp -201.1  
 wv 22101.1  
 vs 138  
 sc 0  
 wc 250  
 hznm 88.44  
 ls 500.03  
 rf1 3008.0  
 rfp 0  
 th 20  
 ins 100.000  
 nm no ph

DEC. 6 VT  
 dfrq 400.133  
 da H1  
 dpr 37  
 dpr 0  
 dpr yyy  
 dpr W  
 dpr 9700  
 dpr 1.00  
 dpr not used

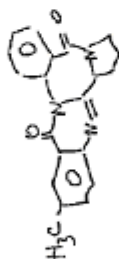

compound 17

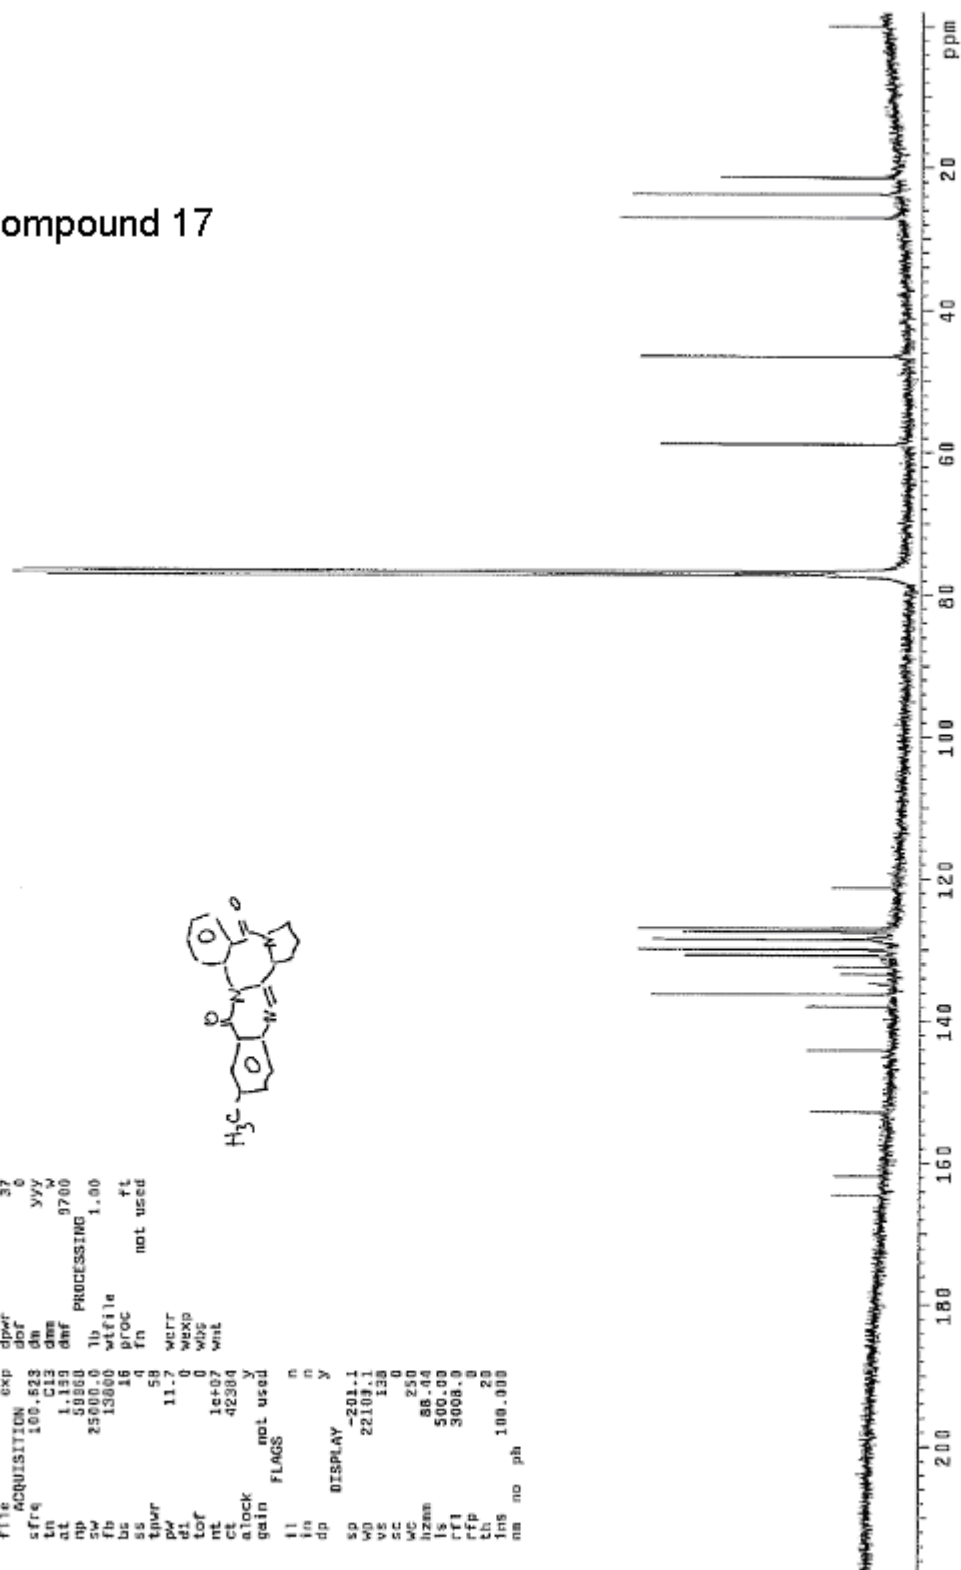

Supplement: Supplementary file 1 [file 5088166]
